# Supplementary material for: Usefulness of Flow Cytometric Analysis for Detecting Leptomeningeal Diseases in Non-Hodgkin Lymphoma
Source: PubMed Central journal article supplement — Ann Lab Med. 2016 Feb 23;36(3):209–14. doi: 10.3343/alm.2016.36.3.209 (PMC4773260; doi:10.3343/alm.2016.36.3.209), 2016-02-23
Supplement: alm-36-209-s001.pdf [file alm-36-209-s001.pdf]

**Supplemental Data Table 1.** Histology and primary sites of 30 patients

| Histology (N)                                       | Primary site*                               |
|-----------------------------------------------------|---------------------------------------------|
| Anaplastic large B-cell lymphoma (2)                | Brain (1)<br>Orbit (1)                      |
| Burkitt lymphoma (2)                                | Axilla lymph node (1)<br>Terminal ilium (1) |
| Diffuse large B cell lymphoma (20)                  | Brain (11)<br>Others (9) <sup>†</sup>       |
| Extranodal marginal zone lymphoma (1)               | Lung (1)                                    |
| Extranodal NK/T cell lymphoma (3)                   | Muscle, thigh (1)<br>Nasal cavity (2)       |
| Mature T cell neoplasm, not otherwise specified (1) | Small intestine (1)                         |
| T-lymphoblastic lymphoma (1)                        | Mediastinum (1)                             |

\*Confirmed by histology; <sup>†</sup>Neck lymph node, spleen, testis, stomach, and adrenal gland.
